# Supplementary material for: Enhanced Raman scattering based on a ZnO/Ag nanostructured substrate: an in-depth study of the SERS mechanism
Source: Royal Society of Chemistry journal article supplement (doi:10.1039/d2cp05732h), 2023-01-01

## SUPPORTING INFORMATION:

Enhance Raman scattering based on a ZnO/Ag nanostructured substrate:  
an in-depth study of the SERS mechanism

Tran Thu Trang<sup>1</sup>, Xuan Hoa Vu<sup>1,\*</sup>, Ngo Thi Lan<sup>1</sup>, Thi Thu Ha Pham<sup>2,\*</sup>,  
Nguyen Dac Dien<sup>3</sup>, Nguyen Van Dang<sup>1</sup>

<sup>1</sup> Institute of Science and Technology, TNU-University of Sciences, Tan Thinh ward, Thai Nguyen City, Vietnam

<sup>2</sup> Faculty of Chemistry, TNU-University of Sciences, Tan Thinh ward, Thai Nguyen City, Vietnam

<sup>3</sup> Faculty of Occupational Safety and Health, Vietnam Trade Union University, 169 Tay Son Street, Dong Da district, Ha Noi City, Vietnam

\* Corresponding authors:

*E-mail addresses:* [hoavx@tnus.edu.vn](mailto:hoavx@tnus.edu.vn); [haptt@tnus.edu.vn](mailto:haptt@tnus.edu.vn)

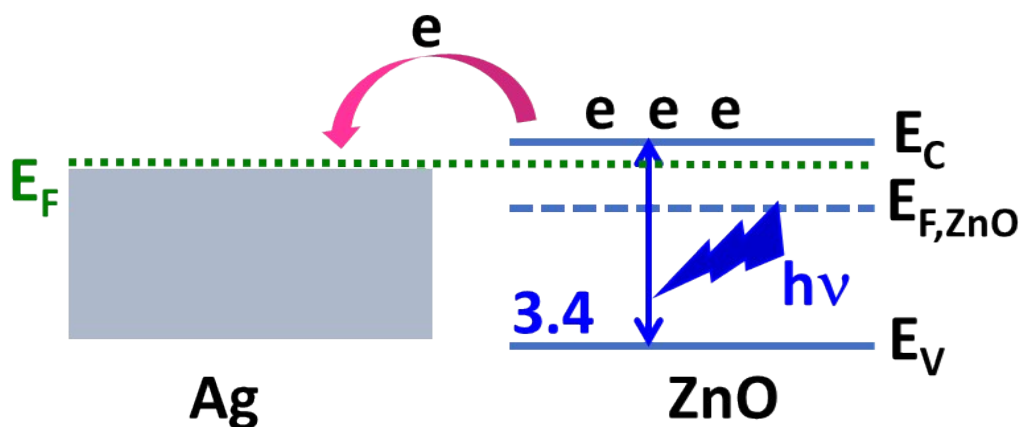

**Figure S1.** Schematic energy band diagram of ZnO-Ag interface of charge transfer from  $E_C$  of ZnO to  $E_F$  under 305 nm laser excitation, causing fluorescence quenching of ZnO.

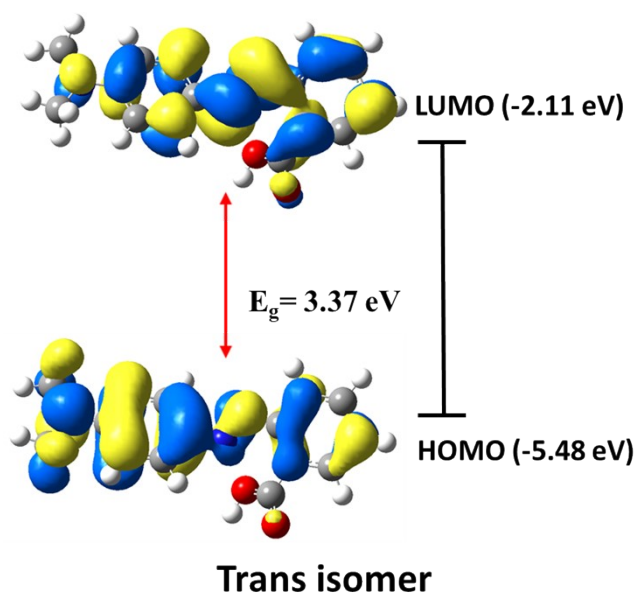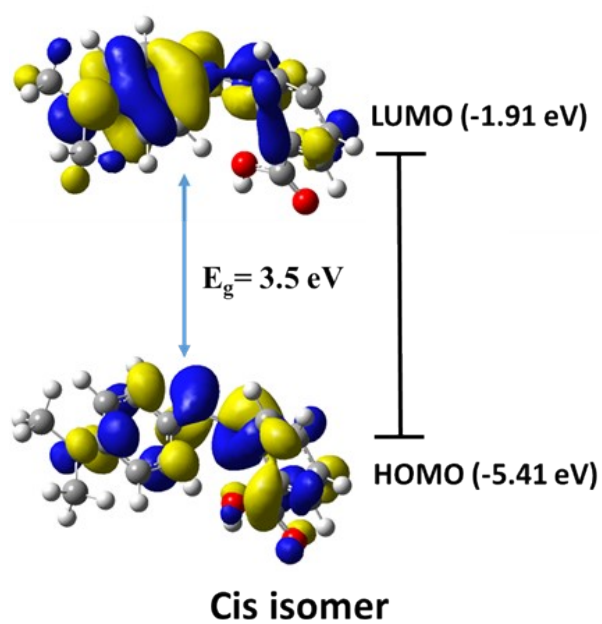

Figure S2: The frontier molecular orbitals (highest occupied molecular orbital (HOMO) and lowest unoccupied molecular orbital (LUMO)) of two trans and cis isomers of MR molecule.

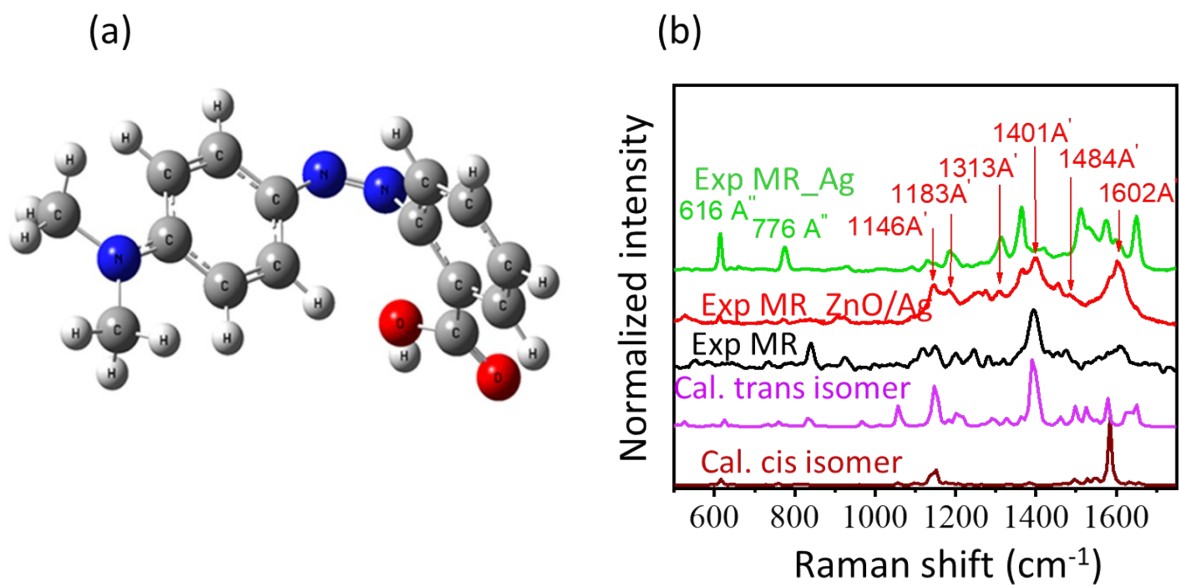

Figure S3: (a) The Optimized molecular structure of the cis isomer; (b) Normalized Raman spectra of Methyl Red in comparison between theoretical calculation study for neutral cis- and trans isomers.

Table S1: Bands assignment of MR molecule in comparison between theoretical calculation (neutral cis isomer), typical Raman spectrum, and SERS substrates of ZnO/Ag and Ag.

| Raman <sub>calculation</sub><br>(cm <sup>-1</sup> ) | Raman <sub>experiment</sub><br>(cm <sup>-1</sup> ) | Frequency (cm <sup>-1</sup> )<br>On SERS surfaces |      | Band assignments<br>Cis form                   |
|-----------------------------------------------------|----------------------------------------------------|---------------------------------------------------|------|------------------------------------------------|
|                                                     |                                                    | ZnO/Ag                                            | Ag   |                                                |
| Cis-                                                |                                                    |                                                   |      |                                                |
| 616                                                 | -                                                  | 612                                               | 616  | C-H in CH <sub>3</sub> Out of plane (A'')      |
| 760                                                 | -                                                  | 770                                               | 776  | C-H Out of plane bending (A'')                 |
| 1148                                                | -                                                  | 1146                                              | 1132 | (C-H in CH <sub>3</sub> In plane bending) (A') |
| 1176                                                | -                                                  | 1183                                              | 1185 | C-H in Benzen; In plane bending (A')           |
| 1328                                                | 1320                                               | 1313                                              | 1314 | C=C; Stretching (A')                           |
| 1386                                                | 1394                                               | 1401                                              | 1364 | C-H in CH <sub>3</sub> ; Stretching (A')       |
| 1496                                                | 1475                                               | 1484                                              | 1512 | C-H; in plane bending (A')                     |
| 1592                                                | 1608                                               | 1602                                              | 1576 | (N=N ; C=C; Stretching) (A')                   |
| 1634                                                | -                                                  | 1650(sh)                                          | 1650 | C=C; streching (A')                            |

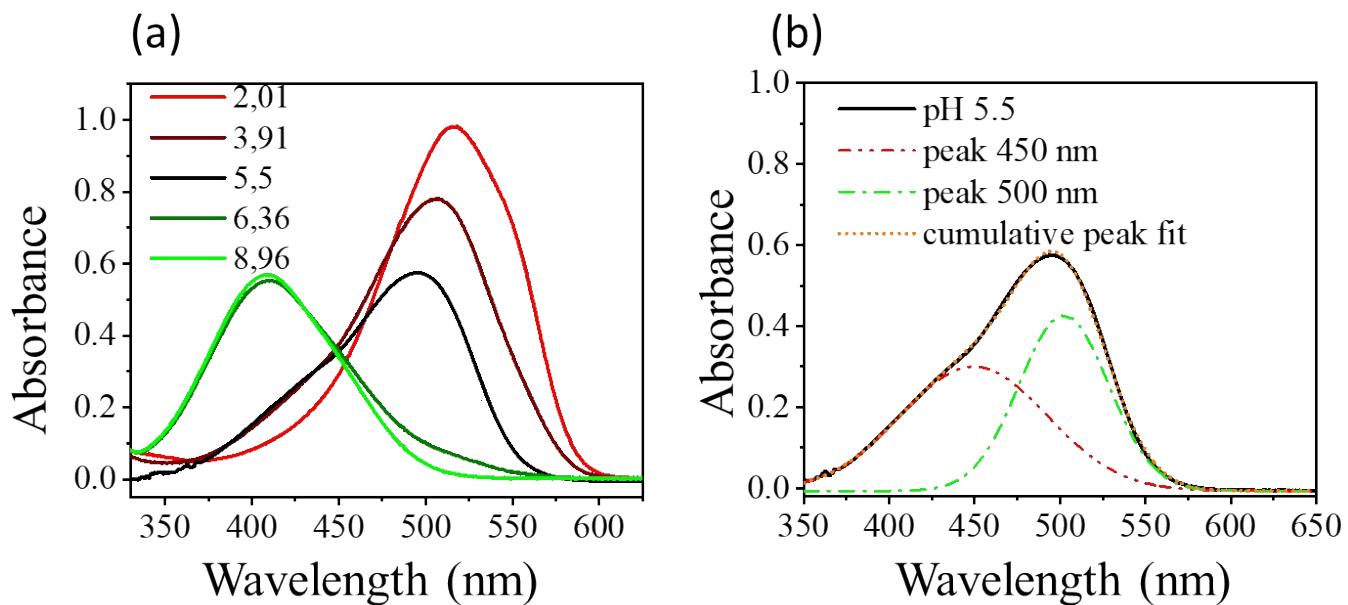

Figure S4: Absorption spectra of MR in ethanol under different pH. The spectrum at pH 5.5 was obtained without needing any pH adjustment.

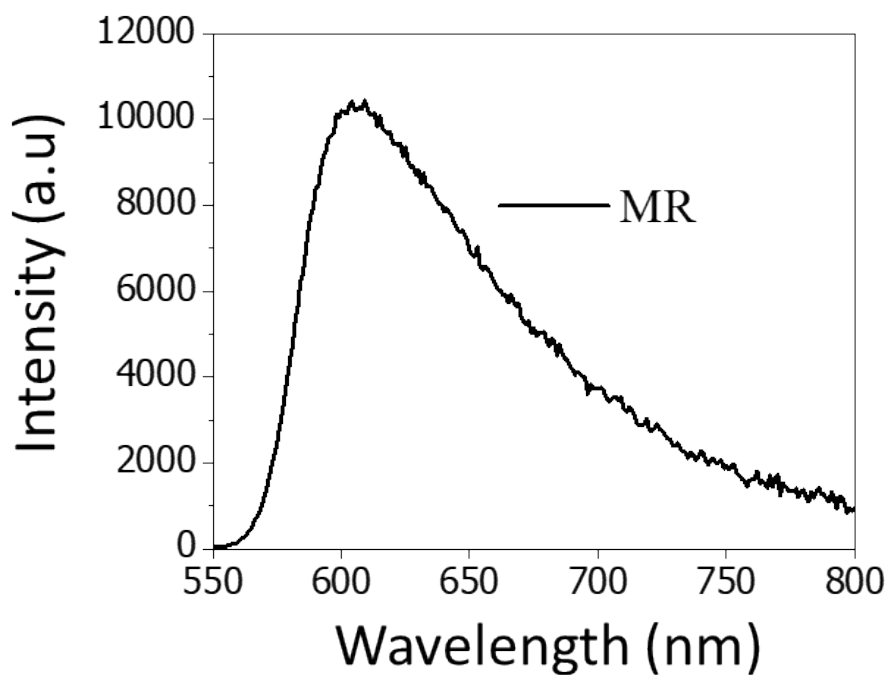

Figure S5. Fluorescence spectrum of MR under excitation wavelength at 500 nm.

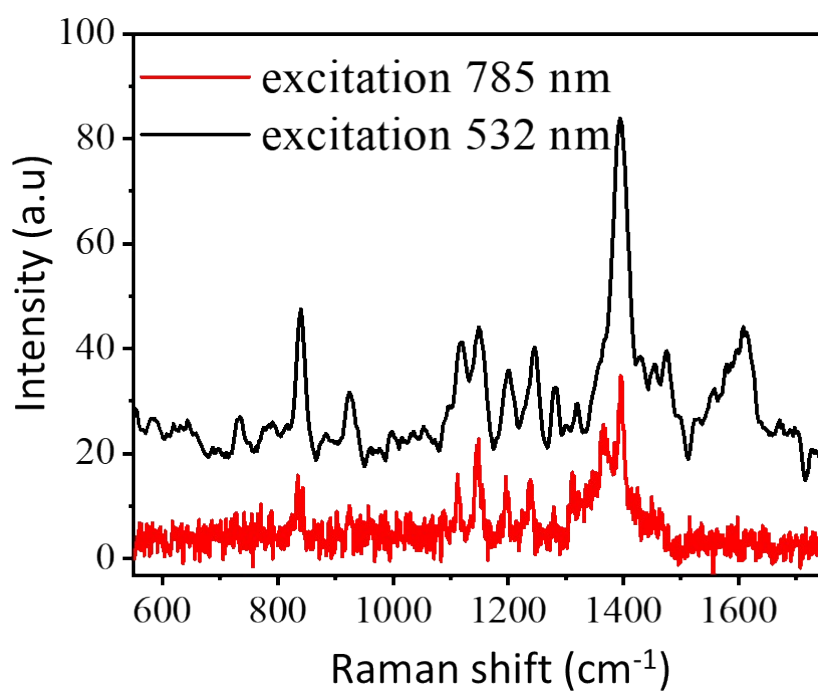

Figure S6: Raman spectra of MR ( $10^{-2}$  M) under two different lasers excitation 532 nm and 785 nm.

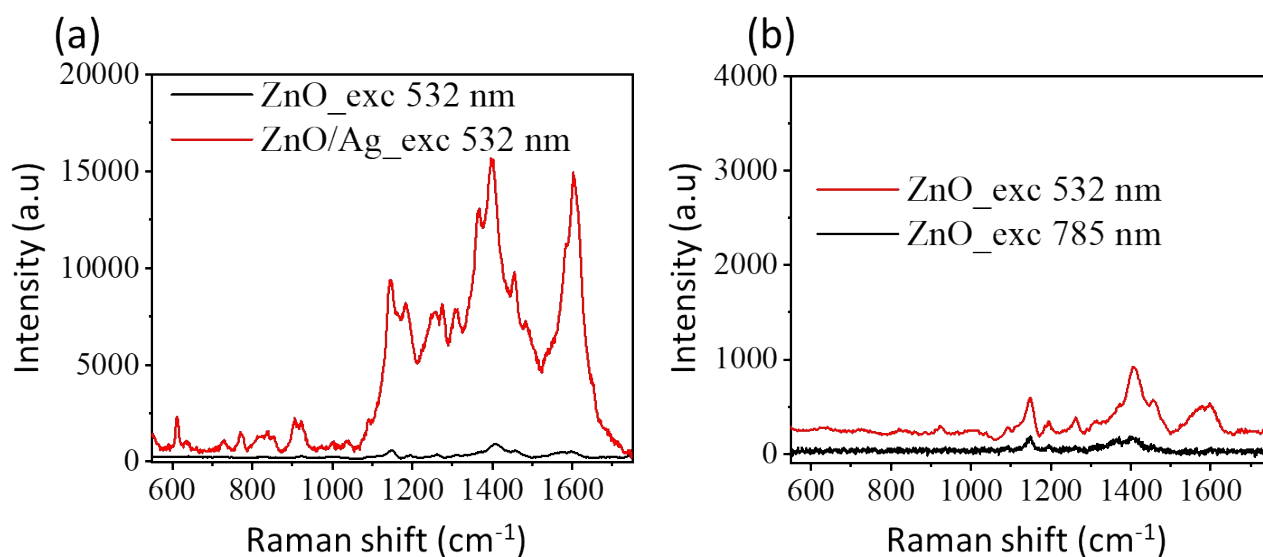

Figure S7: SERS spectra of MR adsorbed on ZnO surface (a) in comparison with ZnO/Ag surface; and (b) under different excitation wavelengths.

**Displacement vectors of neutral trans-isomer at some basic vibration modes:**

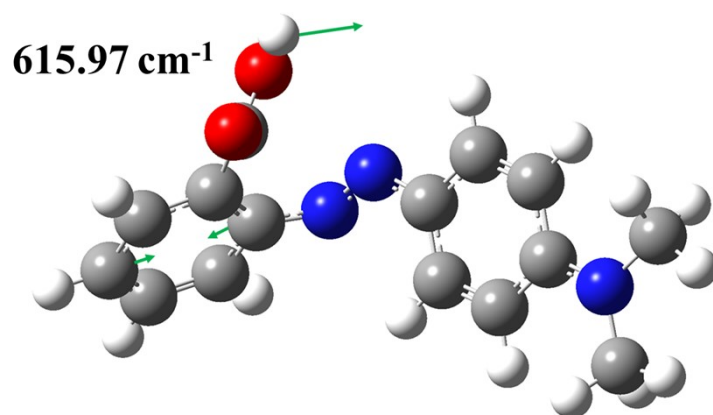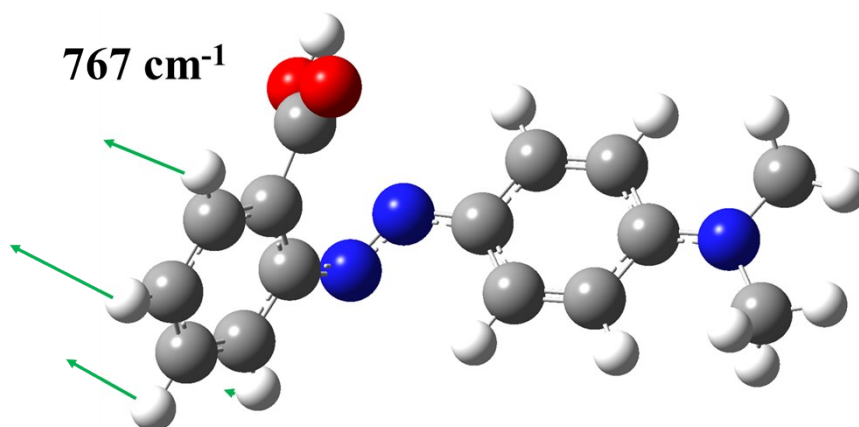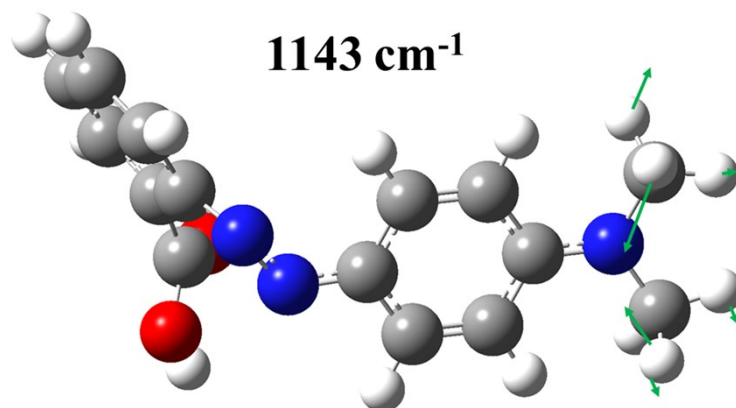

**1176 cm<sup>-1</sup>**

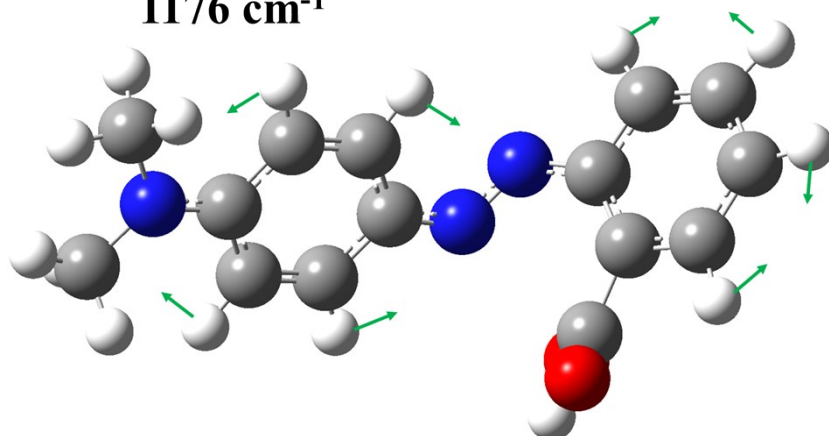

**1315 cm<sup>-1</sup>**

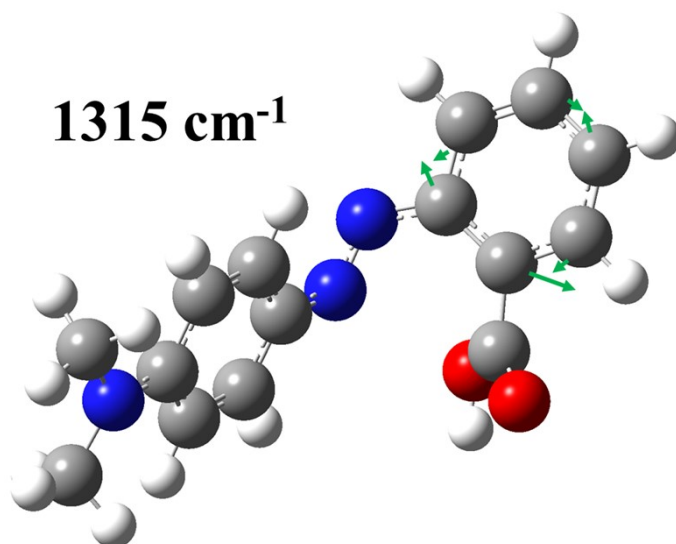

**1490 cm<sup>-1</sup>**

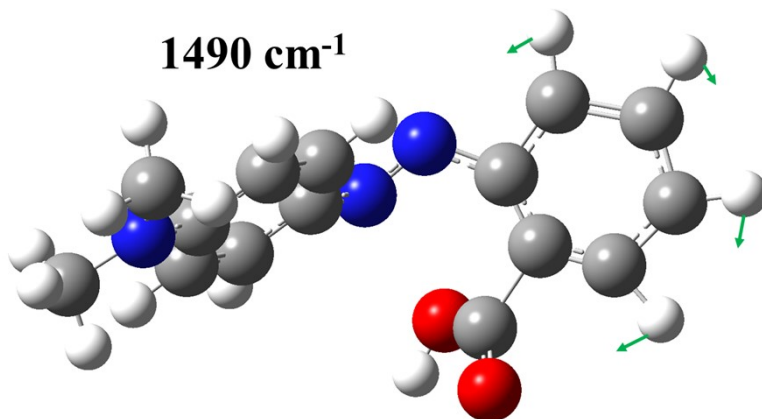



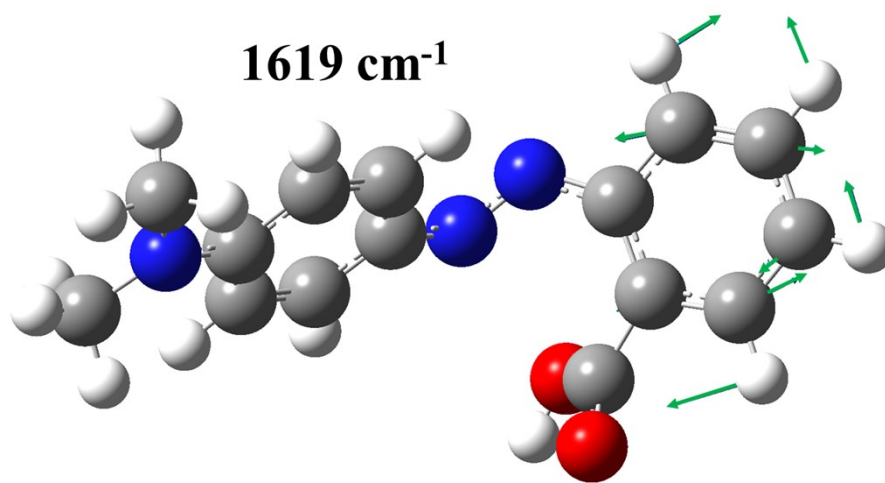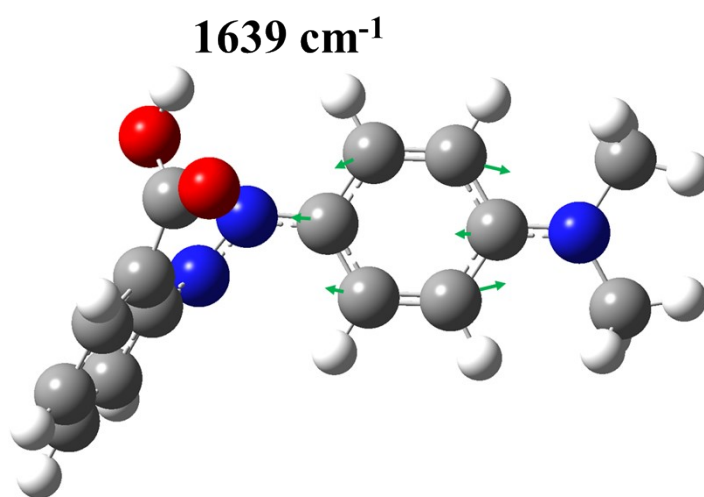

Supplement: d2cp05732h9.pdf [file d2cp05732h9.pdf]
