# Supplementary figures and images for: Enhanced Raman scattering based on a ZnO/Ag nanostructured substrate: an in-depth study of the SERS mechanism
Source: Royal Society of Chemistry journal article supplement (doi:10.1039/d2cp05732h), 2023-01-01

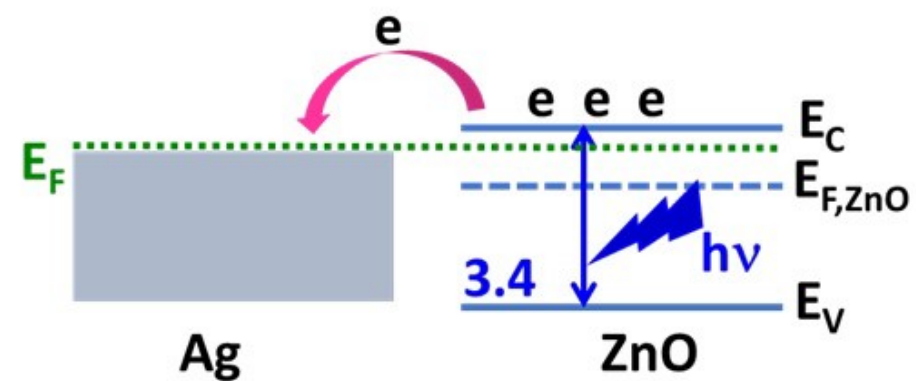

Supplement: d2cp05732h2.pdf [file d2cp05732h2.pdf]

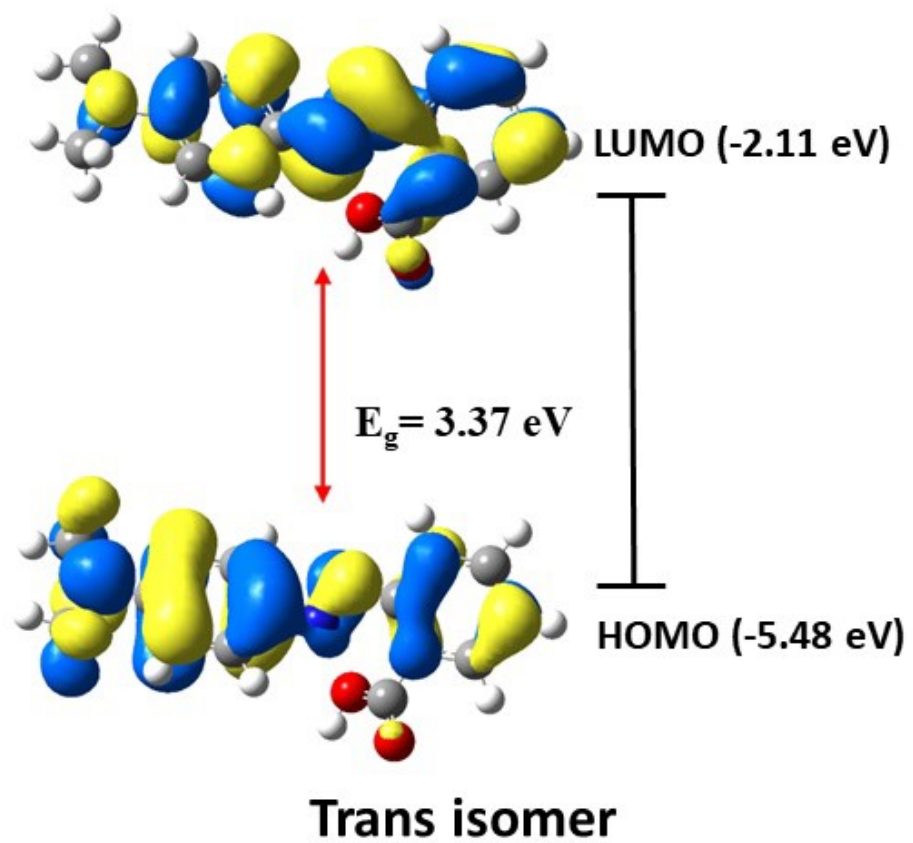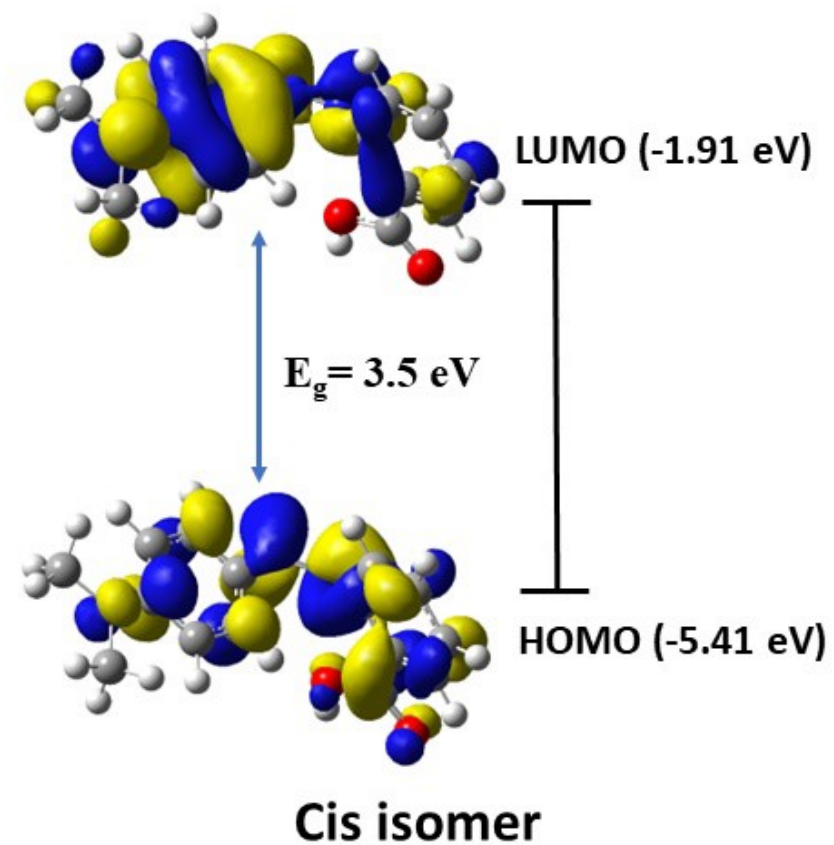

Supplement: d2cp05732h3.pdf [file d2cp05732h3.pdf]

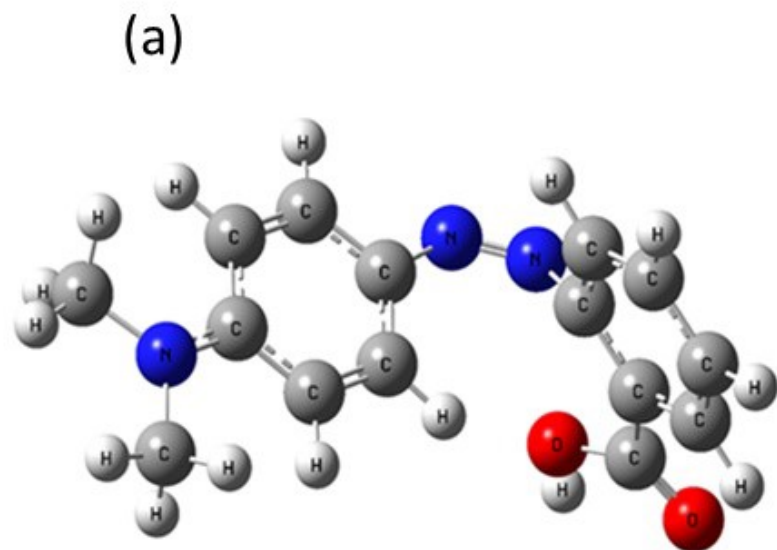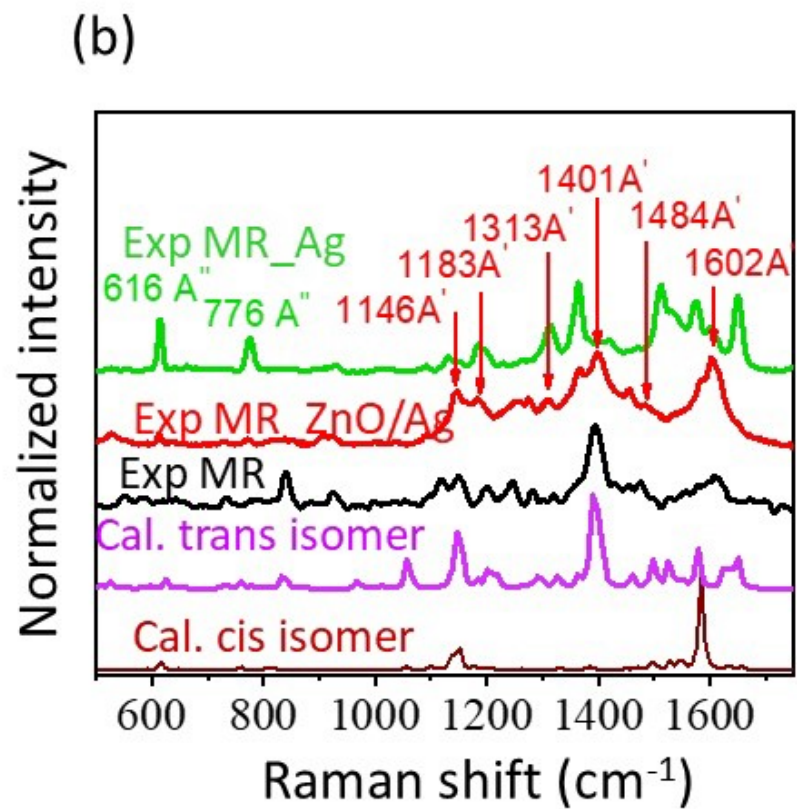

Supplement: d2cp05732h4.pdf [file d2cp05732h4.pdf]

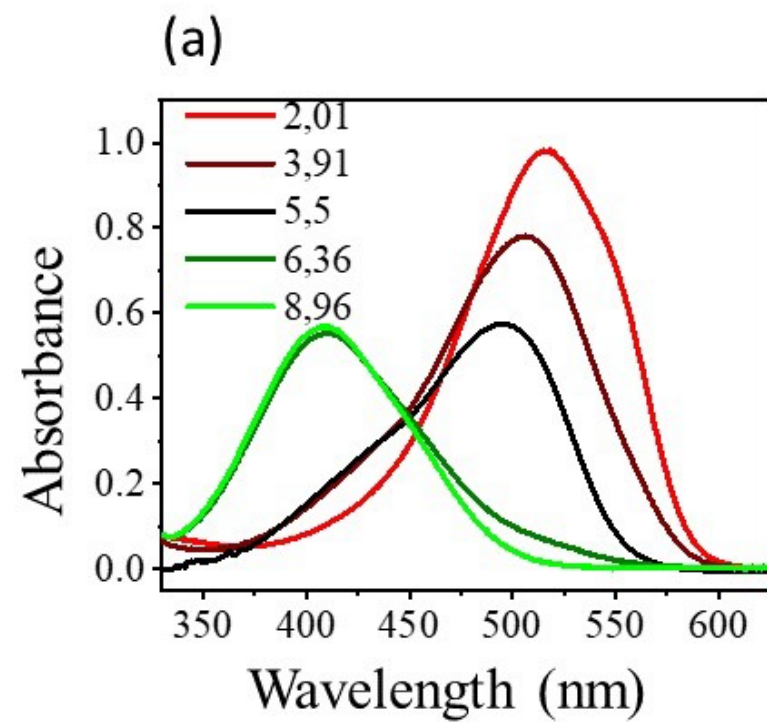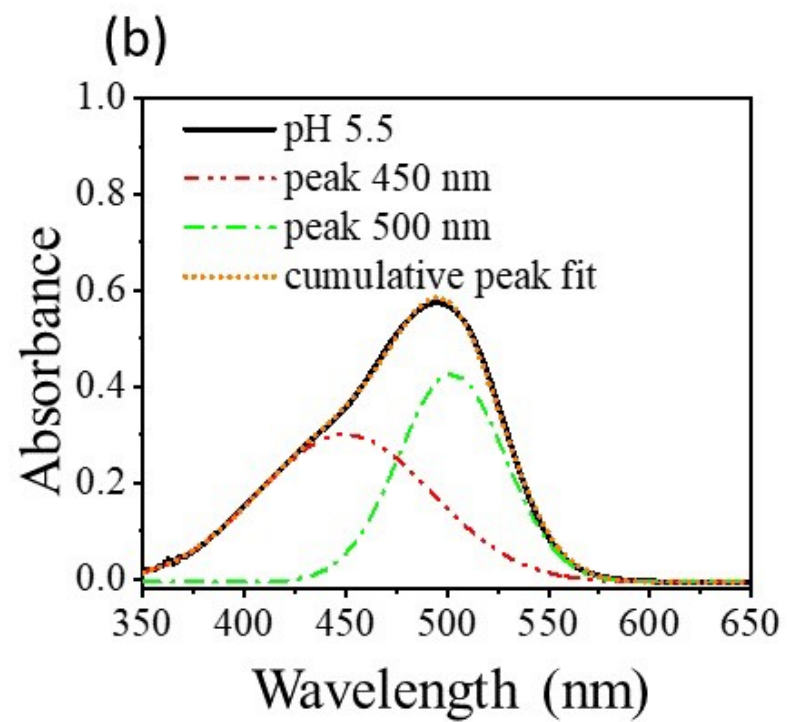

Supplement: d2cp05732h5.pdf [file d2cp05732h5.pdf]

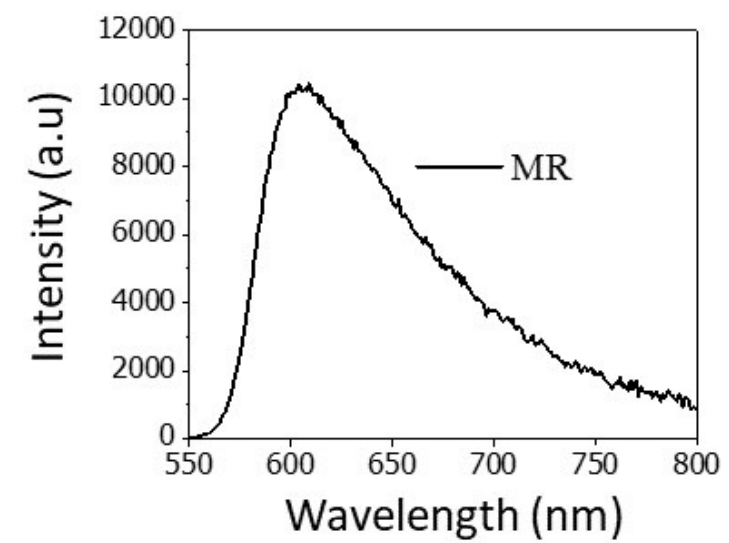

Supplement: d2cp05732h6.pdf [file d2cp05732h6.pdf]

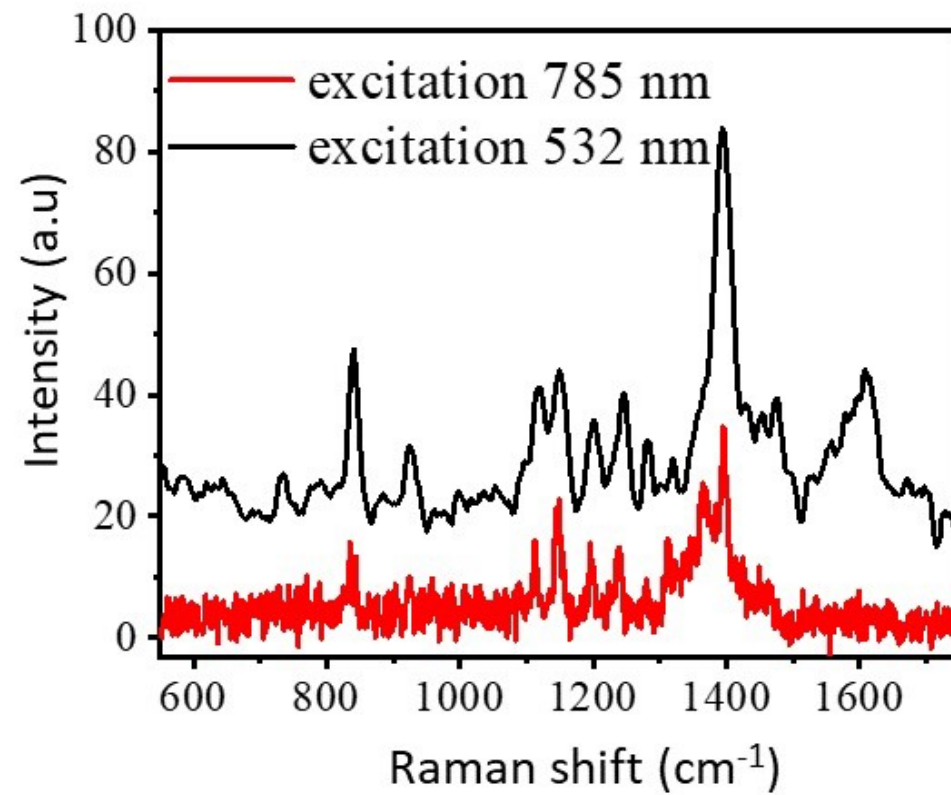

Supplement: d2cp05732h7.pdf [file d2cp05732h7.pdf]

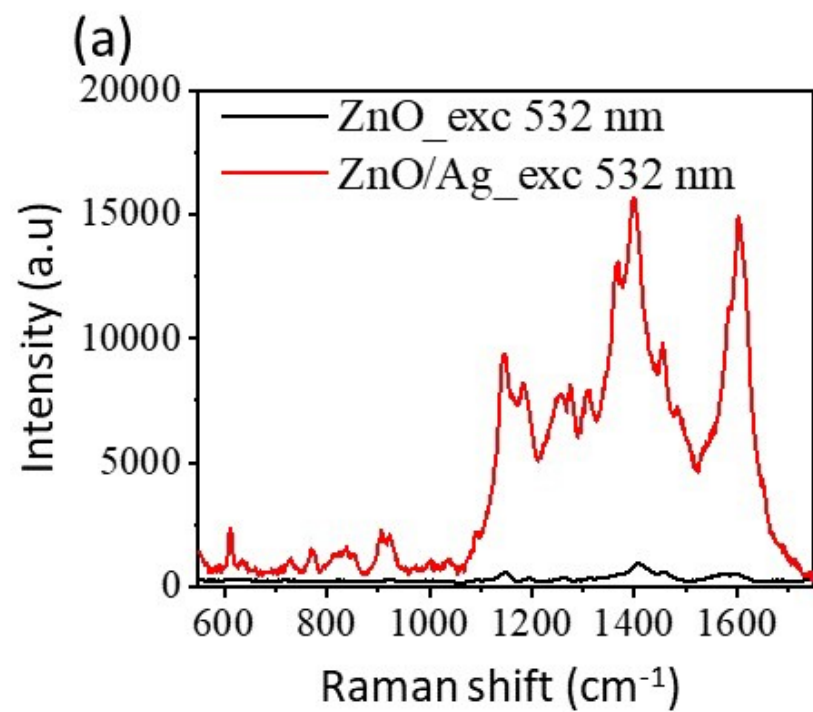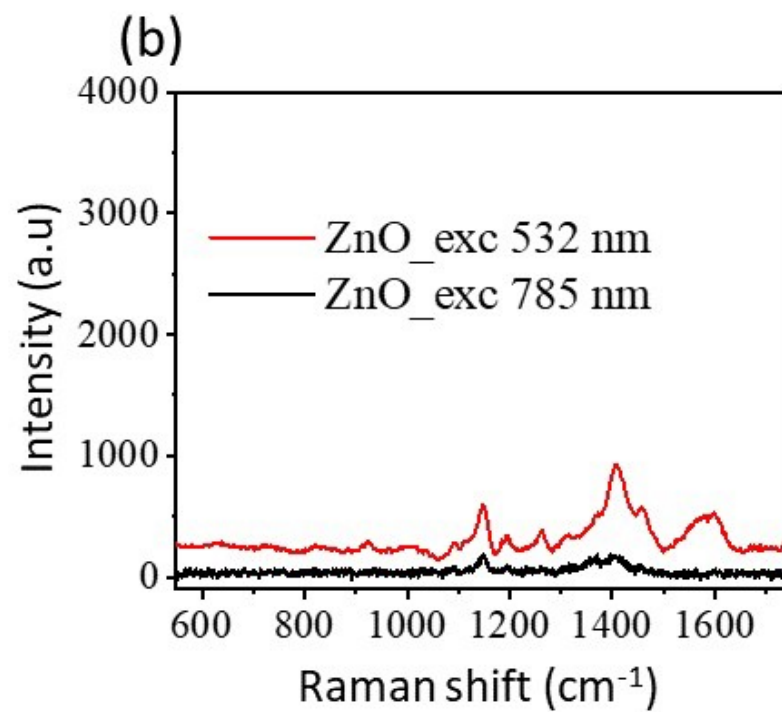

Supplement: d2cp05732h8.pdf [file d2cp05732h8.pdf]
